# Supplementary material for: A Synthetic Lethality Screen Using a Focused siRNA Library to Identify Sensitizers to Dasatinib Therapy for the Treatment of Epithelial Ovarian Cancer
Source: PubMed Central journal article supplement (PMC4670180; doi:10.1371/journal.pone.0144126), 2015-12-04
Supplement: pone.0144126.s004.pdf [file pone.0144126.s004.pdf]

S1 Table

| Primary Screen |             |                                  |                                       |                                     | Secondary Screen |                      |                                                 |                    |                                                   |   |
|----------------|-------------|----------------------------------|---------------------------------------|-------------------------------------|------------------|----------------------|-------------------------------------------------|--------------------|---------------------------------------------------|---|
| Gene ID        | Gene Symbol | SI Value from the Primary Screen | siRNAs Included in the Primary Screen | siRNAs Used in the Secondary Screen | Qiagen siRNA ID  | siRNATarget Sequence | Average SI Value from Secondary Screens (n = 3) | Standard Deviation | siRNAs Selected as Hits from the Secondary Screen |   |
| 1              | 25          | ABL1                             | 0.66                                  | ✓<br>✓                              | Hs_ABL1_10       | SI00288316           | ACGCACGGACATCACCATGAA                           | 0.84               | 0.01                                              | ✓ |
|                |             |                                  |                                       |                                     | Hs_ABL1_11       | SI00288323           | CCAGTGGAGATAAACAACCTAA                          | 0.60               | 0.04                                              |   |
|                |             |                                  |                                       |                                     | Hs_ABL1_8        | SI00299103           | AACCAAGCCTTTGAAACAATG                           | 0.97               | 0.04                                              |   |
|                |             |                                  |                                       |                                     | Hs_ABL1_9        | SI00299110           | AACGGCTGATGTGGACTGTCT                           | 0.75               | 0.10                                              |   |
| 2              | 309         | ANXA6                            | 0.76                                  | ✓                                   | Hs_ANXA6_5       | SI04161528           | AAGGGACTCGGGACTGACGAA                           | 1.01               | 0.01                                              | ✓ |
|                |             |                                  |                                       |                                     | Hs_ANXA6_6       | SI04200336           | TGGCCGGACTTAATGACTGA                            | 0.77               | 0.01                                              |   |
|                |             |                                  |                                       |                                     | Hs_ANXA6_7       | SI04270917           | TCGGTTGGTTCGATGAGTA                             | 0.83               | 0.03                                              |   |
|                |             |                                  |                                       |                                     | Hs_ANXA6_8       | SI04339608           | CGGGCAAGTTTGAACGGTTGA                           | 0.86               | 0.06                                              |   |
| 3              | 50807       | ASAP1                            | 0.81                                  | ✓                                   | Hs_DDEF1_5       | SI04135145           | CAGACTCGCCACATCACCAA                            | 0.90               | 0.06                                              | ✓ |
|                |             |                                  |                                       |                                     | Hs_DDEF1_6       | SI04181800           | GAGCGAGTGAAGACCATTTA                            | 1.01               | 0.01                                              |   |
|                |             |                                  |                                       |                                     | Hs_DDEF1_7       | SI04309088           | CACTGTGGATATAGTTAACCA                           | 1.01               | 0.02                                              |   |
|                |             |                                  |                                       |                                     | Hs_DDEF1_8       | SI04341750           | CCCGCCGAAATCTTTTCAGAA                           | 1.05               | 0.02                                              |   |
| 4              | 430         | ASCL2                            | 0.85                                  | ✓                                   | Hs_ASCL2_2       | SI00073220           | AGGGAGCGTGAACCTTTATAAA                          | 0.97               | 0.01                                              | ✓ |
|                |             |                                  |                                       |                                     | Hs_ASCL2_3       | SI00073227           | CACGCTTTGGGCTTACAGAA                            | 0.94               | 0.05                                              |   |
|                |             |                                  |                                       |                                     | Hs_ASCL2_4       | SI00073234           | AAGGAAGGAGGGCGTGAGAAA                           | 0.92               | 0.04                                              |   |
|                |             |                                  |                                       |                                     | Hs_ASCL2_6       | SI03091018           | CTCGACTTCTCCAGTGGTTA                            | 0.63               | 0.02                                              |   |
| 5              | 56751       | BARHL1                           | 0.73                                  | ✓                                   | Hs_BARHL1_3      | SI00310331           | CAGGACTAAATGGAAGCGACA                           | 0.96               | 0.05                                              | ✓ |
|                |             |                                  |                                       |                                     | Hs_BARHL1_5      | SI04130868           | CACGGCCTTACCACCATCA                             | 0.94               | 0.10                                              |   |
|                |             |                                  |                                       |                                     | Hs_BARHL1_6      | SI04222771           | CTCATCGGACTCTGAGTATA                            | 0.95               | 0.03                                              |   |
|                |             |                                  |                                       |                                     | Hs_BARHL1_7      | SI04238710           | GCGGATGTTCCCGTCGCCTTA                           | 0.96               | 0.04                                              |   |
| 6              | 8412        | BCAR3                            | 0.83                                  | ✓<br>✓                              | Hs_BCAR3_2       | SI00053095           | AAGGTATCAGTTATATGATAT                           | 1.01               | 0.02                                              | ✓ |
|                |             |                                  |                                       |                                     | Hs_BCAR3_3       | SI00053102           | GCCCAACGAGTTTGAGTCAAA                           | 0.73               | 0.10                                              |   |
|                |             |                                  |                                       |                                     | Hs_BCAR3_5       | SI03080196           | CCGAGCGGCACTCTGAGTAA                            | 0.77               | 0.13                                              |   |
|                |             |                                  |                                       |                                     | Hs_BCAR3_6       | SI03081603           | CCGGAACCTCTGGCGTCAACTA                          | 1.04               | 0.06                                              |   |
| 7              | 602         | BCL3                             | 0.76                                  | ✓<br>✓                              | Hs_BCL3_2        | SI00073290           | CACGATGTAAATTTAAGCA                             | 0.85               | 0.03                                              | ✓ |
|                |             |                                  |                                       |                                     | Hs_BCL3_3        | SI00073297           | CTCGACATCTACAACAACCTA                           | 0.87               | 0.04                                              |   |
|                |             |                                  |                                       |                                     | Hs_BCL3_5        | SI02654554           | CAACGTGAACGCGCAAATGTA                           | 0.55               | 0.02                                              |   |
|                |             |                                  |                                       |                                     | Hs_BCL3_6        | SI03082156           | CCGGCCGAGGGCGCTTACTA                            | 0.68               | 0.00                                              |   |
| 8              | 54876       | C4orf30                          | 0.76                                  | ✓<br>✓                              | Hs_C4orf30_1     | SI04162718           | CGGGAGATCTGCCGAGGATAA                           | 1.08               | 0.08                                              | ✓ |
|                |             |                                  |                                       |                                     | Hs_C4orf30_2     | SI04163901           | TCTGACTAAATCAGCCTATAA                           | 0.96               | 0.01                                              |   |
|                |             |                                  |                                       |                                     | Hs_C4orf30_3     | SI04284903           | CCAGATGTTCTTGACAGCTCA                           | 1.03               | 0.01                                              |   |
|                |             |                                  |                                       |                                     | Hs_C4orf30_4     | SI04373012           | ATGGGCCACAAGCATACTTTA                           | 0.70               | 0.05                                              |   |
| 9              | 805         | CALM2                            | 0.65                                  | ✓<br>✓<br>✓                         | Hs_CALM2_3       | SI00027566           | TTGTTTGTAACTTATCTGTAA                           | 0.83               | 0.07                                              | ✓ |
|                |             |                                  |                                       |                                     | Hs_CALM2_5       | SI00605332           | ACAAAGGAATTTGGGAACCTGA                          | 0.98               | 0.09                                              |   |
|                |             |                                  |                                       |                                     | Hs_CALM2_8       | SI02758413           | GACCTTGACAGAATGTGTGA                            | 1.08               | 0.04                                              |   |
|                |             |                                  |                                       |                                     | Hs_CALM2_9       | SI02758420           | AAGCCCTTCTGCACATCTAAA                           | 0.73               | 0.04                                              |   |
| 10             | 868         | CBLB                             | 0.83                                  | ✓<br>✓                              | Hs_CBLB_1        | SI00156765           | TCGGTTGGCAAACGTCGAAA                            | 0.94               | 0.04                                              | ✓ |
|                |             |                                  |                                       |                                     | Hs_CBLB_2        | SI00156772           | TCCGGTTAAGTTGCACTCGAT                           | 1.02               | 0.01                                              |   |
|                |             |                                  |                                       |                                     | Hs_CBLB_3        | SI00156779           | ACGGGCAATAAGACTCTTTAA                           | 0.72               | 0.07                                              |   |
|                |             |                                  |                                       |                                     | Hs_CBLB_5        | SI03072398           | CAGGTGTTGCAGCATATTGA                            | 0.87               | 0.03                                              |   |
| 11             | 896         | CCND3                            | 0.78                                  | ✓<br>✓                              | Hs_CCND3_1       | SI00027860           | GACCATCATCTACTGTAATA                            | 1.02               | 0.04                                              | ✓ |
|                |             |                                  |                                       |                                     | Hs_CCND3_2       | SI00027867           | CAGGAACCACACCACATCTAA                           | 0.63               | 0.02                                              |   |
|                |             |                                  |                                       |                                     | Hs_CCND3_4       | SI00027881           | TGGGACAGAATTGGATACATA                           | 0.82               | 0.01                                              |   |
|                |             |                                  |                                       |                                     | Hs_CCND3_5       | SI03073924           | CATGCGGAAGATGCTGGCTTA                           | 0.75               | 0.02                                              |   |
| 12             | 919         | CD247                            | 0.83                                  | ✓<br>✓                              | Hs_CD3Z_1        | SI00014441           | TTGGTTATATTTAGCTCCAAA                           | 0.99               | 0.06                                              | ✓ |
|                |             |                                  |                                       |                                     | Hs_CD3Z_2        | SI00014448           | CACGCTTTACGCGAATGACAA                           | 0.76               | 0.04                                              |   |
|                |             |                                  |                                       |                                     | Hs_CD3Z_4        | SI00014462           | CAGGAAGCCTGTACAATGAA                            | 0.70               | 0.03                                              |   |
|                |             |                                  |                                       |                                     | Hs_CD247_1       | SI03029397           | AACGAGCTCAATCTAGGACGA                           | 0.87               | 0.02                                              |   |
| 13             | 916         | CD3E                             | 0.82                                  | ✓<br>✓                              | Hs_CD3E_1        | SI00014413           | CTCGCCTACTTAGTAAAGTA                            | 0.95               | 0.06                                              | ✓ |
|                |             |                                  |                                       |                                     | Hs_CD3E_5        | SI02624230           | CAGGATATTTATTTGTGCTAT                           | 0.78               | 0.03                                              |   |
|                |             |                                  |                                       |                                     | Hs_CD3E_6        | SI03055598           | CACAATTTGTCATAGTGGACAT                          | 0.78               | 0.04                                              |   |
|                |             |                                  |                                       |                                     | Hs_CD3E_7        | SI03088848           | CTCAGTATCCTGGATCTGAAA                           | 0.75               | 0.03                                              |   |
| 14             | 1001        | CDH3                             | 0.71                                  | ✓<br>✓                              | Hs_CDH3_5        | SI02663934           | CAGATGAAATCGGCAACTTTA                           | 0.59               | 0.02                                              | ✓ |
|                |             |                                  |                                       |                                     | Hs_CDH3_6        | SI02663941           | AAGCCTCTTACTGCCGTAAA                            | 0.98               | 0.02                                              |   |
|                |             |                                  |                                       |                                     | Hs_CDH3_10       | SI04434633           | AAGGGTGAGGACAATCGTGTA                           | 1.04               | 0.02                                              |   |
|                |             |                                  |                                       |                                     | Hs_CDH3_11       | SI04434640           | CACCCGTGACAACTCTTCTA                            | 1.05               | 0.00                                              |   |
| 15             | 10153       | CEBPZ                            | 0.75                                  | ✓<br>✓                              | Hs_CEBPZ_6       | SI03178007           | CAGTACCACACCGAAAGTAAA                           | 0.97               | 0.07                                              | ✓ |
|                |             |                                  |                                       |                                     | Hs_CEBPZ_7       | SI03237710           | TGGATCGATTTGTATACCGAA                           | 0.79               | 0.01                                              |   |
|                |             |                                  |                                       |                                     | Hs_CEBPZ_8       | SI04150965           | CAGGGTTGATGACGTGTTCCA                           | 1.00               | 0.04                                              |   |
|                |             |                                  |                                       |                                     | Hs_CEBPZ_9       | SI04337977           | AAGGCTACTCTTCCGCTAAA                            | 1.10               | 0.04                                              |   |
| 16             | 1398        | CRK                              | 0.75                                  | ✓<br>✓                              | Hs_CRK_1         | SI00073780           | CAGGATGTACCGAGCACTTTA                           | 0.71               | 0.05                                              | ✓ |
|                |             |                                  |                                       |                                     | Hs_CRK_3         | SI00073794           | CTGAGTATAGTTCAACAGTTT                           | 0.99               | 0.05                                              |   |
|                |             |                                  |                                       |                                     | Hs_CRK_5         | SI00299929           | AATCCGGGACAAAGCCTGAAGA                          | 0.85               | 0.06                                              |   |
|                |             |                                  |                                       |                                     | Hs_CRK_6         | SI03105200           | GCGAGCCCTCTTGTACTTTAA                           | 0.92               | 0.04                                              |   |
| 17             | 1439        | CSF2RB                           | 0.81                                  | ✓<br>✓                              | Hs_CSF2RB_1      | SI00008659           | CTCCTTTGGCCTATTCTACAA                           | 0.92               | 0.03                                              | ✓ |
|                |             |                                  |                                       |                                     | Hs_CSF2RB_3      | SI00008673           | CCCGTCATTCAGCTCTTCAA                            | 1.06               | 0.04                                              |   |
|                |             |                                  |                                       |                                     | Hs_CSF2RB_5      | SI03033079           | AAGCATGTCTGTGATCCACCA                           | 1.01               | 0.03                                              |   |
|                |             |                                  |                                       |                                     | Hs_CSF2RB_6      | SI03034381           | AAGGACAGCCCTGTGGCTATA                           | 0.63               | 0.06                                              |   |
| 18             | 1441        | CSF3R                            | 0.82                                  | ✓<br>✓                              | Hs_CSF3R_1       | SI00015001           | CTGGAGCTGAGAACTACCGAA                           | 0.99               | 0.02                                              | ✓ |
|                |             |                                  |                                       |                                     | Hs_CSF3R_3       | SI00015015           | CTCCTGCATCATCAAGCAGAA                           | 0.98               | 0.03                                              |   |
|                |             |                                  |                                       |                                     | Hs_CSF3R_4       | SI00015022           | TCCTATAACTTCAGTATTGTA                           | 0.98               | 0.02                                              |   |
|                |             |                                  |                                       |                                     | Hs_CSF3R_5       | SI00156723           | CCAGGCGATCTGCATACTTTA                           | 0.68               | 0.04                                              |   |
| 19             | 1457        | CSNK2A1                          | 0.84                                  | ✓<br>✓                              | Hs_CSNK2A1_8     | SI02627247           | CTCCTCAGTCTTGTAAATGTA                           | 0.52               | 0.02                                              | ✓ |
|                |             |                                  |                                       |                                     | Hs_CSNK2A1_9     | SI02660497           | TCCATTGAAGCTGAAATGGTA                           | 0.53               | 0.00                                              |   |
|                |             |                                  |                                       |                                     | Hs_CSNK2A1_10    | SI02660504           | CTGGTCCGTTACATCACTTTA                           | 0.81               | 0.02                                              |   |
|                |             |                                  |                                       |                                     | Hs_CSNK2A1_11    | SI03093839           | CTGATCTAACCTAAATCCAA                            | 1.12               | 0.02                                              |   |

Supplementary Table S1 continued

|    |       |         |      |        |                                                              |                                                      |                                                                                                   |                              |                              |        |
|----|-------|---------|------|--------|--------------------------------------------------------------|------------------------------------------------------|---------------------------------------------------------------------------------------------------|------------------------------|------------------------------|--------|
| 20 | 1495  | CTNNA1  | 0.84 | ✓<br>✓ | Hs_CTNNA1_6<br>Hs_CTNNA1_7<br>Hs_CTNNA1_8<br>Hs_CTNNA1_9     | SI02654673<br>SI02654680<br>SI02663962<br>SI02757377 | AAGTGGATAAGCTGAACATTA<br>CTGAGGAATGCTGGCAATGAA<br>GCCAATTGTGCAGAGTGTA<br>CACCTGATGTCGCAGCCTAT     | 1.05<br>1.03<br>0.98<br>0.87 | 0.03<br>0.02<br>0.03<br>0.07 |        |
| 21 | 1499  | CTNNB1  | 0.84 | ✓<br>✓ | Hs_CTNNB1_3<br>Hs_CTNNB1_4<br>Hs_CTNNB1_5<br>Hs_CTNNB1_9     | SI00029743<br>SI00029750<br>SI02662478<br>SI04379662 | ATGGGTAGGGTAAATCAGTAA<br>TAAGAATTGAGTAATGGTGA<br>CTCGGGATGTTCAACCGAA<br>CAGGATGATCCTAGCTATCGT     | 1.18<br>0.79<br>0.92<br>0.97 | 0.04<br>0.03<br>0.03<br>0.02 |        |
| 22 | 6387  | CXCL12  | 0.82 | ✓<br>✓ | Hs_CXCL12_8<br>Hs_CXCL12_9<br>Hs_CXCL12_10<br>Hs_CXCL12_11   | SI03043222<br>SI03049998<br>SI03649100<br>SI03649149 | AGCCCCGCTGAAGAACAACAA<br>ATGCCGATTCTCGAAAGCCA<br>CTGAAGAACAAACACAGACAA<br>GTGCATTGACCCGAAGCTAAA   | 0.88<br>0.93<br>0.80<br>0.82 | 0.05<br>0.02<br>0.04<br>0.03 | ✓<br>✓ |
| 23 | 1605  | DAG1    | 0.80 | ✓<br>✓ | Hs_DAG1_1<br>Hs_DAG1_5<br>Hs_DAG1_6<br>Hs_DAG1_7             | SI00063322<br>SI02633162<br>SI02633169<br>SI02633176 | AAGAACCATTTGACAGGGTA<br>CCGGTGGTGAATAACAGACTA<br>AAGGGTGTGCATTACATTTCA<br>CAAGAAGATTGCCCTTGGTAAA  | 0.66<br>0.84<br>0.81<br>0.77 | 0.02<br>0.01<br>0.04<br>0.01 | ✓      |
| 24 | 51473 | DCDC2   | 0.71 |        | Hs_DCDC2_5<br>Hs_DCDC2_6<br>Hs_DCDC2_7<br>Hs_DCDC2_8         | SI04193644<br>SI04258429<br>SI04345901<br>SI04363695 | ATGTGACACTATGGTCAATA<br>CAGGTTGAGGTTCCAGTCGAT<br>AAGAGAGTATATGGATCGCAA<br>CAGGCACGCCCTGCTCGTGTA   | 1.03<br>1.09<br>1.08<br>0.97 | 0.03<br>0.02<br>0.05<br>0.02 |        |
| 25 | 9231  | DLG5    | 0.73 | ✓<br>✓ | Hs_DLG5_1<br>Hs_DLG5_2<br>Hs_DLG5_3<br>Hs_DLG5_4             | SI00067858<br>SI00067865<br>SI00067872<br>SI00067879 | ACGGAACCTGATACAGCACAA<br>TTCGAGTAACCTGCAGTTCAA<br>TTGCCTGTTTGTGACTATA<br>CTGTGGCATATTTGTCACTAA    | 0.96<br>0.96<br>0.99<br>0.81 | 0.01<br>0.01<br>0.06<br>0.06 |        |
| 26 | 28514 | DLL1    | 0.83 | ✓<br>✓ | Hs_DLL1_1<br>Hs_DLL1_2<br>Hs_DLL1_3<br>Hs_DLL1_5             | SI00369705<br>SI00369712<br>SI00369719<br>SI03132836 | CACGCAGATCAAGAACCACAA<br>CTCGGGCTGTTCAACTTCAA<br>CCGCGTGTGCCTCAAGCACTA<br>AAGGATGAGTGCATATAGCA    | 0.98<br>0.90<br>1.02<br>0.54 | 0.03<br>0.04<br>0.09<br>0.03 |        |
| 27 | 1846  | DUSP4   | 0.85 |        | Hs_DUSP4_3<br>Hs_DUSP4_8<br>Hs_DUSP4_9<br>Hs_DUSP4_10        | SI00374927<br>SI04154850<br>SI04165056<br>SI04313134 | TACAGTGGATTTAGAATATAT<br>CTGGTTCATGGAAGCCATAGA<br>CACTCCAACTTAGAGCAATAA<br>ACCGTAGCATGCAGATGTCAA  | 1.05<br>1.07<br>1.05<br>0.98 | 0.06<br>0.04<br>0.04<br>0.03 |        |
| 28 | 8655  | DYNLL1  | 0.78 | ✓<br>✓ | Hs_DYNLL1_3<br>Hs_DYNLL1_4<br>Hs_DYNLL1_5<br>Hs_DYNLL1_6     | SI03167052<br>SI04238780<br>SI04271344<br>SI04323921 | CAGAATAGCCTACATTTGTAT<br>AAATCTGATGCAGATGTGTAA<br>TTCGGTAGTTATGTGACACAT<br>TACTAGTTTGTCTGGTTATA   | 0.67<br>0.97<br>1.02<br>0.73 | 0.04<br>0.04<br>0.03<br>0.01 | ✓      |
| 29 | 1950  | EGF     | 0.78 | ✓<br>✓ | Hs_EGF_2<br>Hs_EGF_3<br>Hs_EGF_4<br>Hs_EGF_5                 | SI00030667<br>SI00030674<br>SI00030681<br>SI03105613 | CTGGACTGATACAGGGATTAA<br>AACGATTGACTTCTTAACTGA<br>TACGACTAATCACCTACTCAA<br>GCGGTTTCTCACCAGATA     | 1.04<br>0.73<br>0.64<br>1.00 | 0.05<br>0.02<br>0.03<br>0.04 | ✓<br>✓ |
| 30 | 8662  | EIF3B   | 0.79 |        | Hs{EIF3S9_1<br>Hs{EIF3S9_5<br>Hs{EIF3S9_6<br>Hs{EIF3S9_7     | SI00377825<br>SI04196136<br>SI04285722<br>SI04337613 | CGGGAAGATTGAACTCATCAA<br>CACTGACGAGCTGGACAGCAA<br>CACGGTCATGAACATCGCAGA<br>GACCGACTTGAGAAACTCAA   | 1.01<br>0.86<br>0.85<br>1.02 | 0.04<br>0.04<br>0.03<br>0.00 |        |
| 31 | 2036  | EPB41L1 | 0.62 | ✓<br>✓ | Hs_EPB41L1_1<br>Hs_EPB41L1_2<br>Hs_EPB41L1_5<br>Hs_EPB41L1_7 | SI00097566<br>SI00097573<br>SI00160489<br>SI02639014 | ACGGATGTGCTTTGAAGTTAT<br>CCGCCTAAATAAGAAACGCAA<br>CAGAGTCTCCGCTATGGATA<br>CACGTTACAGTTAGCAGACGA   | 1.02<br>1.00<br>0.79<br>0.82 | 0.01<br>0.00<br>0.05<br>0.04 | ✓<br>✓ |
| 32 | 2037  | EPB41L2 | 0.81 | ✓<br>✓ | Hs_EPB41L2_3<br>Hs_EPB41L2_4<br>Hs_EPB41L2_7<br>Hs_EPB41L2_8 | SI00380247<br>SI00380254<br>SI04294962<br>SI04322409 | CAGGCTAAGGGTGATGCTGAA<br>TCCCATGCATTTAATATATTA<br>CACGAAGGCCTCTTAAGCAA<br>TGCAGCCTACTGAATTAGTAA   | 0.71<br>0.90<br>0.94<br>0.84 | 0.03<br>0.01<br>0.05<br>0.02 | ✓      |
| 33 | 1969  | EPHA2   | 0.73 | ✓<br>✓ | Hs_EPHA2_5<br>Hs_EPHA2_6<br>Hs_EPHA2_7<br>Hs_EPHA2_8         | SI00300181<br>SI00300188<br>SI02223508<br>SI02223515 | AAGGAAGTGGTACTGCTGGAC<br>AAGCGCCTGTTACCAAGATT<br>CAGCGCCAAAGTAAACAGGGTA<br>TCGGACAGACATATAGGATAT  | 1.07<br>0.99<br>0.83<br>0.96 | 0.02<br>0.04<br>0.01<br>0.03 |        |
| 34 | 2044  | EPHA5   | 0.77 | ✓<br>✓ | Hs_EPHA5_4<br>Hs_EPHA5_6<br>Hs_EPHA5_5<br>Hs_EPHA5_8         | SI00063686<br>SI00287511<br>SI02223536<br>SI03649380 | ACCAGTACACGATTATCAA<br>CCGGCAGTATGTGTCTGTAA<br>ACCAGTTGGATCTCCAATGAA<br>TTGGCAGAACATAGCCCACTA     | 1.11<br>0.65<br>0.59<br>0.83 | 0.01<br>0.02<br>0.03<br>0.05 | ✓<br>✓ |
| 35 | 2066  | ERBB4   | 0.80 | ✓<br>✓ | Hs_ERBB4_4<br>Hs_ERBB4_5<br>Hs_ERBB4_6<br>Hs_ERBB4_10        | SI00074214<br>SI02223893<br>SI02223900<br>SI04435067 | CTGGAGAATTTACGCATTATT<br>CTACGTGTTAGTGGCTCTTAA<br>TCGGGATTTGGCAGCCCGTAA<br>CAAGCATTGGATAATCCCGAA  | 1.26<br>0.67<br>0.87<br>1.01 | 0.07<br>0.02<br>0.03<br>0.02 |        |
| 36 | 60412 | EXOC4   | 0.84 | ✓      | Hs_EXOC4_1<br>Hs_EXOC4_2<br>Hs_EXOC4_3<br>Hs_EXOC4_4         | SI03227595<br>SI04242203<br>SI04289411<br>SI04316354 | TAGCCGAGTTGTGCAGCGTAA<br>CACCGCACCTGTACATCAA<br>AACGTTACTGTGGAGAACCAA<br>TAAGGGCTTGGCGAAACTGAA    | 1.06<br>1.06<br>1.09<br>0.88 | 0.02<br>0.03<br>0.02<br>0.07 |        |
| 37 | 2263  | FGFR2   | 0.81 | ✓<br>✓ | Hs_FGFR2_3<br>Hs_FGFR2_6<br>Hs_FGFR2_7<br>Hs_FGFR2_12        | SI00002940<br>SI02623047<br>SI02665299<br>SI04380649 | CGGAGGAGCGTTGCCATTCAA<br>TTAGTTGAGGATACCACATTA<br>CAGCATATGTGTAAGATTTA<br>CCCATCTGACAAGGGAAATTA   | 1.01<br>0.83<br>0.91<br>1.03 | 0.06<br>0.02<br>0.02<br>0.04 |        |
| 38 | 2549  | GAB1    | 0.59 | ✓<br>✓ | Hs_GAB1_1<br>Hs_GAB1_3<br>Hs_GAB1_6<br>Hs_GAB1_7             | SI00031899<br>SI00031913<br>SI02654736<br>SI03077403 | CACGAGCATTTCCAAGTGATA<br>CAGGACCTAGTTCTCTGGTTA<br>TAGATGCTGGATTGACATTTA<br>CCCCACCAGATTCAAGTGCATA | 0.97<br>0.75<br>0.77<br>0.64 | 0.02<br>0.11<br>0.02<br>0.12 | ✓<br>✓ |
| 39 | 2597  | GAPDH   | 0.85 | ✓<br>✓ | Hs_GAPD_5<br>Hs_GAPD_7<br>Hs_GAPDH_3<br>Hs_GAPDH_6           | SI02653266<br>SI02655926<br>SI03571113<br>SI04220279 | CCGAGCCACATCGCTCAGACA<br>CTCCTCTGACTTCAACAGCGA<br>AAGGTCGGAGTCAACGGATTT<br>CAGGAGCGAGATCCCTCCAAA  | 0.91<br>1.10<br>0.94<br>1.13 | 0.07<br>0.06<br>0.05<br>0.02 |        |
| 40 | 2690  | GHR     | 0.82 | ✓<br>✓ | Hs_GHR_3<br>Hs_GHR_4<br>Hs_GHR_5<br>Hs_GHR_6                 | SI00003444<br>SI00003451<br>SI03037090<br>SI03072104 | TAGAACCTAATTCAATTCAA<br>TCCAAGAGCTACGTATTTAA<br>AAGTGTAAATCCAGGCCTAAA<br>CAGGTGAGCGACATTACACCA    | 1.05<br>0.93<br>0.84<br>0.91 | 0.01<br>0.01<br>0.01<br>0.03 |        |

Supplementary Table S1 continued

|    |        |          |      |             |                                                                  |                                                      |                                                                                                   |                              |                              |        |
|----|--------|----------|------|-------------|------------------------------------------------------------------|------------------------------------------------------|---------------------------------------------------------------------------------------------------|------------------------------|------------------------------|--------|
| 41 | 2775   | GNAO1    | 0.76 | ✓           | Hs_GNAO1_2<br>Hs_GNAO1_4<br>Hs_GNAO1_7<br>Hs_GNAO1_9             | SI00128632<br>SI00128646<br>SI03050523<br>SI04658416 | CAGCGCCGCCAAGACGTGAA<br>CAGGTGCTCCACGAAGACGAA<br>ATGGACACTTTGGGCATCGAA<br>CGGCTCCAGCCTCGACTATTA   | 0.90<br>0.76<br>0.97<br>1.04 | 0.02<br>0.06<br>0.04<br>0.04 |        |
| 42 | 10750  | GRAP     | 0.84 | ✓           | Hs_GRAP_1<br>Hs_GRAP_5<br>Hs_GRAP_7<br>Hs_GRAP_9                 | SI00430668<br>SI03156279<br>SI03189088<br>SI04180519 | CAACATCAGGATGTCCGTC<br>CAACGAGCTGGTCCGACTTCTA<br>CCGCCGTGGCGACATCATTGA<br>CAGGAAGGTTGAGGACTCCCA   | 0.69<br>1.06<br>0.82<br>1.00 | 0.04<br>0.03<br>0.04<br>0.05 | ✓<br>✓ |
| 43 | 2885   | GRB2     | 0.66 | ✓<br>✓      | Hs_GRB2_1<br>Hs_GRB2_3<br>Hs_GRB2_5<br>Hs_GRB2_8                 | SI00032550<br>SI00032564<br>SI00300328<br>SI02654750 | CTGGTATTCTCTATGCAAA<br>TAGGTAGTGATTAACGTGAA<br>AAGTTTGGAAACGATGTGCAG<br>CAAGAACTACATAGAAATGAA     | 0.93<br>0.91<br>0.65<br>0.67 | 0.05<br>0.10<br>0.02<br>0.08 | ✓<br>✓ |
| 44 | 3280   | HES1     | 0.84 | ✓<br>✓<br>✓ | Hs_HES1_2<br>Hs_HES1_3<br>Hs_HES1_4<br>Hs_HES1_5                 | SI00078330<br>SI00078337<br>SI00078344<br>SI03075016 | CTGGTGTGATAACAGCGGAA<br>CACGACACCGGATAAACCCAAA<br>AAAGACGAAGAGCAAGAATAA<br>CCAGATCAATGCCATGACCTA  | 1.17<br>1.00<br>1.00<br>0.64 | 0.05<br>0.01<br>0.02<br>0.04 |        |
| 45 | 3320   | HSP90AA1 | 0.77 | ✓<br>✓      | Hs_HSPCA_4<br>Hs_HSPCA_5<br>Hs_HSP90AA1_1<br>Hs_HSP90AA1_2       | SI00075971<br>SI02635024<br>SI03028606<br>SI03117814 | ATGGCATGACAACACTTTAA<br>CAGAATGAAGGAGAACCAGAA<br>AACCCTGACCATTCCATTATT<br>TGCACTGTAAGACGTATGTAA   | 0.88<br>1.09<br>0.86<br>0.71 | 0.07<br>0.01<br>0.05<br>0.02 |        |
| 46 | 7184   | HSP90B1  | 0.72 | ✓<br>✓      | Hs_TRA1_5<br>Hs_TRA1_6<br>Hs_TRA1_8<br>Hs_TRA1_9                 | SI00302008<br>SI02630838<br>SI02655177<br>SI02663738 | AAGTTGATGTGGATGGTACAG<br>ATGGATTAATGCATCACAAA<br>AAGTTGATGTGGATGGTACAT<br>TCGCCTCAGTTTGAACATTGA   | 0.76<br>1.02<br>0.89<br>0.96 | 0.03<br>0.02<br>0.03<br>0.03 |        |
| 47 | 3717   | JAK2     | 0.82 | ✓<br>✓      | Hs_JAK2_4<br>Hs_JAK2_6<br>Hs_JAK2_7<br>Hs_JAK2_8                 | SI00070742<br>SI02634177<br>SI02659657<br>SI02659664 | ATCACTAGATACATATCTGAA<br>CAGAATTAGCAAACCTTATAA<br>AGCCATCATACGAGATCTTAA<br>CTGCCTACGATGACAGAAT    | 0.94<br>0.73<br>0.86<br>0.80 | 0.04<br>0.06<br>0.02<br>0.03 | ✓<br>✓ |
| 48 | 3728   | JUP      | 0.72 | ✓<br>✓      | Hs_JUP_1<br>Hs_JUP_2<br>Hs_JUP_3<br>Hs_JUP_4                     | SI00034720<br>SI00034727<br>SI00034734<br>SI00034741 | ATGCGTAACTACAGTTATGAA<br>CCAGAGCATGATCCCATCAA<br>AACCATCGGCTTGATCAGGAA<br>CCGCATCTCCGAGGACAAGAA   | 0.80<br>0.74<br>1.05<br>0.93 | 0.09<br>0.03<br>0.02<br>0.05 | ✓<br>✓ |
| 49 | 3791   | KDR      | 0.78 | ✓<br>✓      | Hs_KDR_4<br>Hs_KDR_5<br>Hs_KDR_6<br>Hs_KDR_8                     | SI00035259<br>SI00605528<br>SI00605535<br>SI03649436 | TACCAGTACGGCACCCTCAA<br>AAGCTGACATGTACGGTCTA<br>AAGGCTAATACAACTCTTCAA<br>CAGGGACCTGGCGGCACGAAA    | 0.92<br>0.62<br>0.91<br>0.90 | 0.03<br>0.01<br>0.04<br>0.04 |        |
| 50 | 7071   | KLF10    | 0.79 | ✓<br>✓<br>✓ | Hs_KLF10_4<br>Hs_KLF10_5<br>Hs_KLF10_8<br>Hs_KLF10_9             | SI00079926<br>SI02635668<br>SI03043236<br>SI03082268 | CCGGCGCATCTATCAGCCAA<br>ATGGCTTATGTCATCAGTAAA<br>AGCCCGTTGTGCGAGAGTTCAA<br>CCGGCGGTTTATGAGGAGTGA  | 1.01<br>1.06<br>0.80<br>0.72 | 0.02<br>0.04<br>0.08<br>0.04 | ✓<br>✓ |
| 51 | 283455 | KSR2     | 0.82 | ✓<br>✓      | Hs_KSR2_5<br>Hs_KSR2_6<br>Hs_KSR2_7<br>Hs_KSR2_8                 | SI02665544<br>SI02665551<br>SI04379158<br>SI04379165 | CAGGCTTACCGTGGACGCCTA<br>AAGGAAATCCATTACTTCAA<br>CTGGCTCGACTGGAGCATTA<br>AACCACGAGCACTTAATATA     | 0.83<br>1.02<br>0.93<br>0.99 | 0.02<br>0.04<br>0.03<br>0.01 |        |
| 52 | 63920  | LOC63920 | 0.70 | ✓           | Hs_LOC63920_5<br>Hs_LOC63920_6<br>Hs_LOC63920_7<br>Hs_LOC63920_8 | SI03121783<br>SI04156558<br>SI04270252<br>SI04370149 | AAAGAGATACCTCATATCGTA<br>TTCTCGGACATCATTGAACAA<br>TGCCATGTGCAAGAAACGCAA<br>AAGAGCAGTAATTTAGTTGAT  | 1.06<br>1.01<br>1.01<br>1.08 | 0.03<br>0.03<br>0.04<br>0.03 |        |
| 53 | 5599   | MAPK8    | 0.76 | ✓<br>✓      | Hs_MAPK8_9<br>Hs_MAPK8_12<br>Hs_MAPK8_14<br>Hs_MAPK8_15          | SI00300783<br>SI02757209<br>SI02758644<br>SI02758651 | AAGAAGCTAAGCCGACCATTT<br>GTGGAAAGAATTTGATATATA<br>ATGAAATGTGTTAATCACAAA<br>ATGATGTGTCTTCAATGTCAA  | 1.01<br>1.07<br>0.95<br>0.69 | 0.02<br>0.03<br>0.01<br>0.06 |        |
| 54 | 4739   | NEDD9    | 0.83 | ✓<br>✓      | Hs_NEDD9_1<br>Hs_NEDD9_2<br>Hs_NEDD9_5<br>Hs_NEDD9_6             | SI00657363<br>SI00657370<br>SI03166898<br>SI03192406 | CACCAAGAACAAGAGGTATA<br>CGCTGCCGAAATGAAGTATA<br>CAGAAGCTCTATCAAGTGCCA<br>CCTGACCGTCATAGAGCAGAA    | 0.90<br>0.67<br>0.62<br>0.58 | 0.02<br>0.02<br>0.05<br>0.03 | ✓<br>✓ |
| 55 | 25983  | NGDN     | 0.82 | ✓           | Hs_C14orf120_2<br>Hs_NGDN_1<br>Hs_NGDN_2<br>Hs_NGDN_3            | SI00318584<br>SI04253305<br>SI04316585<br>SI04367349 | ACGCTTGGTCCAGTACATTA<br>CAGCAATATGATGAGCAAGTT<br>CTGGTGCTATCCTACAGAAA<br>ATGAGGATCAGAATCCTATTA    | 0.92<br>0.75<br>0.87<br>1.00 | 0.03<br>0.13<br>0.04<br>0.01 |        |
| 56 | 5063   | PAK3     | 0.78 | ✓<br>✓      | Hs_PAK3_4<br>Hs_PAK3_5<br>Hs_PAK3_6<br>Hs_LOC100129569_4         | SI00039851<br>SI00287434<br>SI02628983<br>SI04808300 | CCCTCATGAGTAAGACTGAA<br>TTCCAGTACTTTGTACAGGAA<br>CAAGAAGGAATTAATTATTA<br>CTGGGATGAGCAAGGTGTAAA    | 0.76<br>0.72<br>0.95<br>0.85 | 0.01<br>0.05<br>0.00<br>0.00 | ✓<br>✓ |
| 57 | 50855  | PARD6A   | 0.84 | ✓<br>✓      | Hs_PARD6A_2<br>Hs_PARD6A_3<br>Hs_PARD6A_5<br>Hs_PARD6A_6         | SI00117873<br>SI00117880<br>SI02664340<br>SI03048619 | GACGGACATGATGGTTGCCAA<br>CGAGGTGAAGAGCAAATTTGA<br>CCAGGTTTCCCTCAGTCATAGA<br>ATCGTCCGAGGTGAAGAGCAA | 1.08<br>0.88<br>0.81<br>0.83 | 0.05<br>0.01<br>0.02<br>0.03 | ✓<br>✓ |
| 58 | 5159   | PDGFRB   | 0.83 | ✓<br>✓      | Hs_PDGFRB_4<br>Hs_PDGFRB_5<br>Hs_PDGFRB_6<br>Hs_PDGFRB_8         | SI00040383<br>SI00605738<br>SI00605745<br>SI03034773 | ATCCATCAACGTCTCTGTGAA<br>CCGAGCAACTTTGATCAACGA<br>CTGCCGAGCAACTTTGATCAA<br>AAGGAGGACCCATCTATATCA  | 0.92<br>0.75<br>0.65<br>0.93 | 0.02<br>0.02<br>0.04<br>0.01 | ✓<br>✓ |
| 59 | 5296   | PIK3R2   | 0.73 | ✓<br>✓      | Hs_PIK3R2_2<br>Hs_PIK3R2_5<br>Hs_PIK3R2_6<br>Hs_PIK3R2_7         | SI00071547<br>SI00287532<br>SI00287539<br>SI04378983 | CGCGGTGAGGGCAACGAGAAA<br>CCGCGAGTATGACCAGCTTTA<br>TTGGTACGTGGGCAAGATCAA<br>CTCGGACCAACAGAGATCGA   | 0.83<br>1.00<br>0.64<br>1.00 | 0.08<br>0.10<br>0.05<br>0.04 | ✓<br>✓ |
| 60 | 23236  | PLCB1    | 0.84 | ✓<br>✓      | Hs_PLCB1_5<br>Hs_PLCB1_6<br>Hs_PLCB1_9<br>Hs_PLCB1_10            | SI02780939<br>SI02781184<br>SI04439106<br>SI04439113 | TCGAGATTACATGGATGTTAA<br>CAGAGATGATCCGGTCATATA<br>TTCCGCCAGGCTATCACTATA<br>AAGGGTCAAACATCGAGATTA  | 0.88<br>0.74<br>0.96<br>1.04 | 0.02<br>0.04<br>0.02<br>0.04 |        |
| 61 | 5336   | PLCG2    | 0.81 | ✓<br>✓      | Hs_PLCG2_4<br>Hs_PLCG2_5<br>Hs_PLCG2_7<br>Hs_PLCG2_10            | SI00041223<br>SI02662681<br>SI03106138<br>SI04380950 | GACGCGGACTACCAAGATCAA<br>GACGAGGTTGTGAATGATAA<br>GGGCGGGACCCTGAAATACTA<br>CAGAGTTTCTCATACATGAA    | 0.85<br>0.82<br>0.81<br>0.69 | 0.02<br>0.02<br>0.01<br>0.03 | ✓<br>✓ |

Supplementary Table S1 continued

|    |       |         |      |        |                                                                |                                                      |                                                                                                   |                              |                              |        |
|----|-------|---------|------|--------|----------------------------------------------------------------|------------------------------------------------------|---------------------------------------------------------------------------------------------------|------------------------------|------------------------------|--------|
| 62 | 5337  | PLD1    | 0.80 | ✓      | Hs_PLD1_3<br>Hs_PLD1_6<br>Hs_PLD1_7<br>Hs_PLD1_8               | SI00686357<br>SI04166134<br>SI04271176<br>SI04369316 | ATGGGATATTTGATTACGTAA<br>CAGGCCTGACGCATTCTCGTA<br>TACCGGGTATATGTCGTGATA<br>ACCGGCGGAGGAAATGCTCTA  | 0.76<br>0.98<br>1.00<br>0.98 | 0.04<br>0.01<br>0.02<br>0.05 |        |
| 63 | 5359  | PLSCR1  | 0.77 | ✓<br>✓ | Hs_PLSCR1_3<br>Hs_PLSCR1_4<br>Hs_PLSCR1_5<br>Hs_PLSCR1_6       | SI00129332<br>SI00129339<br>SI03067043<br>SI03075751 | ACGTAAGATTCAGGAAACGAA<br>CGGGTGTGGCGCAAAGGTTA<br>CAGCGCCACAGCCTCCATTAA<br>CCAGTGTATAATCAGCCAGTA   | 1.08<br>1.05<br>0.66<br>0.82 | 0.13<br>0.09<br>0.04<br>0.06 | ✓<br>✓ |
| 64 | 5456  | POU3F4  | 0.73 | ✓<br>✓ | Hs_POU3F4_4<br>Hs_POU3F4_5<br>Hs_POU3F4_6<br>Hs_POU3F4_7       | SI00006748<br>SI03021214<br>SI03062675<br>SI03077410 | ACAGTTCGCCAAACAATTCAA<br>TGGTCTGTAATCGAAGACAA<br>CAGAACTTCTCAAAGTGAT<br>CCCGACCAGCATTGACAAGAT     | 0.95<br>0.98<br>0.89<br>0.94 | 0.01<br>0.04<br>0.05<br>0.02 |        |
| 65 | 5578  | PRKCA   | 0.81 | ✓<br>✓ | Hs_PRKCA_5<br>Hs_PRKCA_6<br>Hs_PRKCA_7<br>Hs_PRKCA_8           | SI00301308<br>SI00605927<br>SI00605934<br>SI02629368 | AACCATCCGCTCCACACTAAA<br>CGCAGTGAATGAGTCCTTTA<br>TACAAGTTGCTTAACCAAGAA<br>CAGCTGGTTATTGCTAACATA   | 0.82<br>0.76<br>1.05<br>0.89 | 0.02<br>0.04<br>0.03<br>0.01 | ✓<br>✓ |
| 66 | 5581  | PRKCE   | 0.81 | ✓<br>✓ | Hs_PRKCE_5<br>Hs_PRKCE_6<br>Hs_PRKCE_7<br>Hs_PRKCE_10          | SI00287784<br>SI02622088<br>SI03059658<br>SI04379424 | CCCGACCATGGTAGTGTCAA<br>CAGGAAACACCCGTACCTTA<br>CACGACGAGTTCGTACCAGT<br>AAGAGTGTATGTGATCATCGA     | 0.76<br>0.73<br>1.00<br>0.95 | 0.05<br>0.01<br>0.03<br>0.03 | ✓<br>✓ |
| 67 | 2889  | RAPGEF1 | 0.62 | ✓<br>✓ | Hs_RAPGEF1_2<br>Hs_RAPGEF1_3<br>Hs_RAPGEF1_5<br>Hs_RAPGEF1_7   | SI00075621<br>SI00075628<br>SI02634989<br>SI03099194 | CCGGGTTTAGGACGTGGTCAA<br>GCAGGTCTTGTGGCAATTTA<br>CAGGAAAGATTTGGTGTGTA<br>CTGGTCCGGTCCATAATCAT     | 0.91<br>0.88<br>0.64<br>0.78 | 0.05<br>0.01<br>0.04<br>0.01 | ✓<br>✓ |
| 68 | 9252  | RPS6KA5 | 0.80 | ✓<br>✓ | Hs_RPS6KA5_8<br>Hs_RPS6KA5_9<br>Hs_RPS6KA5_11<br>Hs_RPS6KA5_12 | SI02225433<br>SI02225440<br>SI03025232<br>SI03025428 | AAGCCAGTCATTGAGATGAA<br>CTGGATCTCTACGTAATTGA<br>TTGGGATGATTTAGCCGCCAA<br>TTGGGTGTTCTAATGTATGAA    | 0.68<br>0.73<br>1.01<br>0.68 | 0.02<br>0.03<br>0.25<br>0.03 | ✓<br>✓ |
| 69 | 10045 | SH2D3A  | 0.85 | ✓<br>✓ | Hs_SH2D3A_3<br>Hs_SH2D3A_5<br>Hs_SH2D3A_6<br>Hs_SH2D3A_7       | SI00078036<br>SI03071236<br>SI03072167<br>SI03105074 | CGGCTCTGGTTCACAGTTATA<br>CAGGCAAGGAAGTGGAGCAA<br>CAGGTGCCACAGGATGGAGAA<br>GCCGTGATTTCTAGCAGTTGA   | 1.06<br>0.94<br>0.88<br>1.11 | 0.03<br>0.05<br>0.05<br>0.02 |        |
| 70 | 25759 | SHC2    | 0.72 | ✓<br>✓ | Hs_SHC2_3<br>Hs_SHC2_6<br>Hs_SHC2_7<br>Hs_SHC2_12              | SI00717801<br>SI02825256<br>SI02825263<br>SI04280220 | AAGGATCTGTTGACATGCGA<br>ACGGAACCATTTCCGCTTTAA<br>TTCGGATCGGTTTGAATTTA<br>AGTGAGGGTGTTCATACCCAA    | 1.01<br>0.77<br>0.95<br>1.00 | 0.01<br>0.06<br>0.03<br>0.02 |        |
| 71 | 80725 | SNIP    | 0.75 | ✓<br>✓ | Hs_SNIP_3<br>Hs_SNIP_5<br>Hs_SNIP_6<br>Hs_SNIP_7               | SI00728161<br>SI03233727<br>SI04132849<br>SI04191481 | CAGGCCACTAAACCATCTAAA<br>TCGCATCATCGCAGAGCTAGA<br>CCCGCTGTACGGCCAGCGCTA<br>AAGGACCTCATAAATGATGCA  | 0.76<br>0.94<br>0.83<br>1.09 | 0.07<br>0.03<br>0.06<br>0.02 | ✓<br>✓ |
| 72 | 8651  | SOCS1   | 0.77 | ✓<br>✓ | Hs_SOCS1_1<br>Hs_SOCS1_4<br>Hs_SOCS1_5<br>Hs_SOCS1_6           | SI00055370<br>SI00055391<br>SI03107342<br>SI03108812 | CTGGTGTGTGAGCAGCTTAA<br>TAGGATGGTAGCACACAACCA<br>TAAAGTCAGTTTAGGTAATAA<br>TACCAGTATCTTTGCACAAA    | 0.88<br>1.03<br>0.99<br>0.74 | 0.04<br>0.03<br>0.04<br>0.01 |        |
| 73 | 6655  | SOS2    | 0.81 | ✓      | Hs_SOS2_5<br>Hs_SOS2_6<br>Hs_SOS2_7<br>Hs_SOS2_8               | SI04166631<br>SI04189416<br>SI04307436<br>SI04349884 | CCCCTCTCAGCTAATGAA<br>TTGGACGAAGCTGTGGAATTA<br>CTTCATTATCGTAGTACTCTA<br>CTGAGATTACCAAGTCTCGAA     | 0.68<br>1.07<br>0.87<br>1.06 | 0.02<br>0.01<br>0.03<br>0.03 |        |
| 74 | 92521 | SPECC1  | 0.69 | ✓      | Hs_HCMOGT-1_3<br>Hs_SPECC1_2<br>Hs_SPECC1_3<br>Hs_SPECC1_4     | SI00434770<br>SI04160646<br>SI04201141<br>SI04266983 | CAGGCTCGAAGTGAACATAAA<br>CAGCACCGGGCTGTCAAGTTA<br>TCAAGTAGCGATTTACCAAAA<br>CAAGAATTATCAGACCAGCAA  | 0.98<br>0.93<br>1.04<br>0.92 | 0.01<br>0.02<br>0.00<br>0.03 |        |
| 75 | 6714  | SRC     | 0.79 | ✓<br>✓ | Hs_SRC_6<br>Hs_SRC_7<br>Hs_SRC_10<br>Hs_SRC_11                 | SI02223921<br>SI02223928<br>SI02664151<br>SI03041605 | AAGCAGTGCCTGCCTATGAAA<br>CGGCTTGTGGGTGATGTTTGA<br>CTCCATGTGCGTCCATATTTA<br>ACGGCGCGGCAAGGTGCCAAA  | 0.70<br>0.65<br>1.03<br>1.00 | 0.03<br>0.02<br>0.02<br>0.01 | ✓<br>✓ |
| 76 | 79718 | TBL1XR1 | 0.75 | ✓<br>✓ | Hs_TBL1XR1_1<br>Hs_TBL1XR1_9<br>Hs_TBL1XR1_10<br>Hs_TBL1XR1_11 | SI00136808<br>SI02645727<br>SI03025925<br>SI03110905 | AAGGAGCTATCTGTTTATGTA<br>TAGATACTAGATTGTATTGAA<br>TTGTTTGTGATGTCGACCAATA<br>TAGCACCTTAGGGCAGCATAA | 0.97<br>1.04<br>0.86<br>0.80 | 0.04<br>0.01<br>0.09<br>0.06 |        |
| 77 | 7205  | TRIP6   | 0.75 | ✓<br>✓ | Hs_TRIP6_1<br>Hs_TRIP6_2<br>Hs_TRIP6_4<br>Hs_TRIP6_5           | SI00050421<br>SI00050428<br>SI02630866<br>SI03069654 | CACGGGCTCCCTGAAGCCAAA<br>CTGTATGACTTTGTCACCAAAA<br>TGGGCTGCTTTGTATGTTCTA<br>CAGGAGGAGACTGTGAGAATT | 1.04<br>1.02<br>0.99<br>0.78 | 0.00<br>0.06<br>0.04<br>0.08 |        |
| 78 | 54822 | TRPM7   | 0.70 | ✓<br>✓ | Hs_TRPM7_5<br>Hs_TRPM7_6<br>Hs_TRPM7_7<br>Hs_TRPM7_8           | SI03048465<br>SI03079468<br>SI03083549<br>SI03095806 | ATCGGAGGTCTGGCCGAAATA<br>CCCTGACGGTAGATACATTA<br>CCTGTAAGATCTATCGTTCAA<br>CTGCTAGCGTATATTCATAAA   | 0.99<br>0.78<br>0.96<br>0.65 | 0.03<br>0.11<br>0.02<br>0.05 | ✓<br>✓ |
| 79 | 7409  | VAV1    | 0.83 | ✓<br>✓ | Hs_VAV1_2<br>Hs_VAV1_3<br>Hs_VAV1_4<br>Hs_VAV1_5               | SI00077007<br>SI00077014<br>SI00077021<br>SI03054401 | CAGCATTAAATATAACGTCGA<br>CAGGTGGAGTCAAGCAGCAAAA<br>GTCGAGGTCAAGCACATTA<br>CAAGGAGAGGTTCTCGTCTA    | 0.99<br>0.94<br>0.82<br>0.72 | 0.02<br>0.04<br>0.03<br>0.04 | ✓<br>✓ |
| 80 | 9948  | WDR1    | 0.84 | ✓      | Hs_WDR1_5<br>Hs_WDR1_6<br>Hs_WDR1_7<br>Hs_WDR1_8               | SI03122448<br>SI04186756<br>SI04195254<br>SI04247922 | AAAGTGCCTCATCCTAAGGAA<br>CTCCCTGTCCGGGTACATCAA<br>CAGCGGACAAGGAGTTGTGAA<br>CAGCCTCATGCTGCGGACTA   | 0.93<br>1.02<br>0.95<br>0.94 | 0.02<br>0.02<br>0.05<br>0.02 |        |
| 81 | 7520  | XRCC5   | 0.78 | ✓<br>✓ | Hs_XRCC5_4<br>Hs_XRCC5_6<br>Hs_XRCC5_7<br>Hs_XRCC5_8           | SI00129675<br>SI02663766<br>SI02663773<br>SI03022271 | ACCCTCATAAGTCTGCACTAA<br>AAGCATAACTATGAGTGTTTA<br>AAGCGAGTAACCAGCTCATA<br>TTCCGCTATGGAAGTGATATA   | 0.78<br>0.92<br>0.85<br>1.05 | 0.07<br>0.04<br>0.04<br>0.04 | ✓<br>✓ |
| 82 | 7525  | YES1    | 0.81 | ✓<br>✓ | Hs_YES1_5<br>Hs_YES1_6<br>Hs_YES1_7<br>Hs_YES1_8               | SI00302218<br>SI02223935<br>SI02223942<br>SI02635206 | AATCCCTCCATGAATTGATGA<br>CCAGCCTACATTCACCTCTAA<br>GAGGCTCCTGCTTATTTATA<br>AAGTATAATGCAGTACATTA    | 0.96<br>0.75<br>0.81<br>0.91 | 0.02<br>0.02<br>0.03<br>0.01 | ✓<br>✓ |

Supplementary Table S1 continued

|    |      |        |      |   |              |            |                       |      |      |  |
|----|------|--------|------|---|--------------|------------|-----------------------|------|------|--|
| 83 | 8882 | ZNF259 | 0.71 |   | Hs_ZNF259_9  | SI04197018 | TGAGATGAAGTGGAGCGTTA  | 1.03 | 0.03 |  |
|    |      |        |      |   | Hs_ZNF259_10 | SI04203570 | TTGAATTGGCCTAGGAGGAAA | 0.76 | 0.04 |  |
|    |      |        |      |   | Hs_ZNF259_11 | SI04344487 | GTCGCTATGCATGAACTGTTA | 1.06 | 0.01 |  |
|    |      |        |      |   | Hs_ZNF259_12 | SI04349156 | CTGAAGGAGCTAAAGCAAGTA | 0.89 | 0.03 |  |
| 84 | 7791 | ZYX    | 0.84 | ✓ | Hs_ZYX_1     | SI00302225 | AAGGTGAGCAGTATTGATTTG | 0.75 | 0.02 |  |
|    |      |        |      |   | Hs_ZYX_3     | SI02651320 | CAGAATGTGGCTGTCAACGAA | 1.08 | 0.04 |  |
|    |      |        |      |   | Hs_ZYX_6     | SI02651341 | CAGTATTGATTTGGAGATCGA | 1.00 | 0.05 |  |
|    |      |        |      |   | Hs_ZYX_8     | SI04209856 | CCAGGTGGATCTGGGTCACAA | 0.95 | 0.04 |  |
