# Supplementary material for: A Synthetic Lethality Screen Using a Focused siRNA Library to Identify Sensitizers to Dasatinib Therapy for the Treatment of Epithelial Ovarian Cancer
Source: PubMed Central journal article supplement (PMC4670180; doi:10.1371/journal.pone.0144126), 2015-12-04
Supplement: pone.0144126.s005.pdf [file pone.0144126.s005.pdf]

**S2 Table**

|    | Gene ID | Gene Symbol | Percent Reduction in Gene Expression | Average Ct Value from Negative Control Wells | Selected for Further Studies |
|----|---------|-------------|--------------------------------------|----------------------------------------------|------------------------------|
| 1  | 25      | ABL1        | 88%                                  | 24.9                                         | ✓                            |
| 2  | 309     | ANXA6       | 92%                                  | 23.4                                         | ✓                            |
| 3  | 8412    | BCAR3       | 81%                                  | 25.9                                         | ✓                            |
| 4  | 602     | BCL3        | 85%                                  | 27.9                                         | ✓                            |
| 5  | 805     | CALM2       | 64%                                  | 27.9                                         |                              |
| 6  | 896     | CCND3       | 97%                                  | 26.7                                         | ✓                            |
| 7  | 919     | CD247       | Undetermined                         | >35 cycles                                   |                              |
| 8  | 916     | CD3E        | Undetermined                         | >35 cycles                                   |                              |
| 9  | 1398    | CRK         | 87%                                  | 26.4                                         | ✓                            |
| 10 | 1457    | CSNK2A1     | 87%                                  | 24.0                                         | ✓                            |
| 11 | 6387    | CXCL12      | Undetermined                         | >35 cycles                                   |                              |
| 12 | 1605    | DAG1        | 91%                                  | 24.7                                         | ✓                            |
| 13 | 8655    | DYNLL1      | 92%                                  | 25.9                                         | ✓                            |
| 14 | 1950    | EGF         | 74%                                  | 29.8                                         | ✓                            |
| 15 | 2036    | EPB41L1     | 94%                                  | 25.7                                         | ✓                            |
| 16 | 2037    | EPB41L2     | 76%                                  | 24.9                                         | ✓                            |
| 17 | 2044    | EPHA5       | Increased expression                 | 31.5                                         |                              |
| 18 | 2549    | GAB1        | 75%                                  | 26.7                                         | ✓                            |
| 19 | 10750   | GRAP        | Undetermined                         | >35 cycles                                   |                              |
| 20 | 2885    | GRB2        | 92%                                  | 24.0                                         | ✓                            |
| 21 | 3717    | JAK2        | 78%                                  | 28.9                                         | ✓                            |
| 22 | 3728    | JUP         | 86%                                  | 25.4                                         | ✓                            |
| 23 | 7071    | KLF10       | 82%                                  | 25.9                                         | ✓                            |
| 24 | 4739    | NEDD9       | 78%                                  | 28.1                                         | ✓                            |
| 25 | 5063    | PAK3        | 86%                                  | 31.0                                         | ✓                            |
| 26 | 50855   | PARD6A      | 97%                                  | 31.0                                         | ✓                            |
| 27 | 5159    | PDGFRB      | 79%                                  | 27.7                                         | ✓                            |
| 28 | 5296    | PIK3R2      | Increased expression                 | 27.6                                         |                              |
| 29 | 5336    | PLCG2       | 73%                                  | 29.4                                         | ✓                            |
| 30 | 5359    | PLSCR1      | 90%                                  | 26.0                                         | ✓                            |
| 31 | 5578    | PRKCA       | 84%                                  | 25.0                                         | ✓                            |
| 32 | 5581    | PRKCE       | 79%                                  | 27.9                                         | ✓                            |
| 33 | 2889    | RAPGEF1     | 94%                                  | 26.0                                         | ✓                            |
| 34 | 9252    | RPS6KA5     | 62%                                  | 29.6                                         |                              |
| 35 | 80725   | SNIP        | 58%                                  | 26.0                                         |                              |
| 36 | 6714    | SRC         | 85%                                  | 25.3                                         | ✓                            |
| 37 | 54822   | TRPM7       | 81%                                  | 27.9                                         | ✓                            |
| 38 | 7409    | VAV1        | 74%                                  | 27.9                                         | ✓                            |
| 39 | 7520    | XRCC5       | 74%                                  | 22.8                                         | ✓                            |
| 40 | 7525    | YES1        | 95%                                  | 26.0                                         | ✓                            |
