# Supplementary material for: A Synthetic Lethality Screen Using a Focused siRNA Library to Identify Sensitizers to Dasatinib Therapy for the Treatment of Epithelial Ovarian Cancer
Source: PubMed Central journal article supplement (PMC4670180; doi:10.1371/journal.pone.0144126), 2015-12-04
Supplement: pone.0144126.s006.pdf [file pone.0144126.s006.pdf]

S3 Table

| Specificity of Hits |         |             |                                          |                                         | Correlation of Hits                 |         |
|---------------------|---------|-------------|------------------------------------------|-----------------------------------------|-------------------------------------|---------|
|                     | Gene ID | Gene Symbol | Dasatinib Avg SI Value $\pm$ SEM (n = 2) | Imatinib Avg SI Value $\pm$ SEM (n = 2) | Spearman Correlation Coefficient, r | P Value |
| 1                   | 2549    | GAB1        | 0.31 $\pm$ 0.01                          | 0.84 $\pm$ 0.13                         | ND                                  | ND      |
| 2                   | 2036    | EPB41L1     | 0.40 $\pm$ 0.03                          | 0.94 $\pm$ 0.10                         | 0.39                                | 0.3956  |
| 3                   | 8412    | BCAR3       | 0.44 $\pm$ 0.03                          | 0.91 $\pm$ 0.04                         | 0.86                                | 0.0238  |
| 4                   | 1457    | CSNK2A1     | 0.46 $\pm$ 0.02                          | 0.88 $\pm$ 0.05                         | -0.82                               | 0.0341  |
| 5                   | 1605    | DAG1        | 0.48 $\pm$ 0.03                          | 0.95 $\pm$ 0.03                         | -0.54                               | 0.2357  |
| 6                   | 896     | CCND3       | 0.49 $\pm$ 0.01                          | 0.92 $\pm$ 0.05                         | -0.46                               | 0.3024  |
| 7                   | 2889    | RAPGEF1     | 0.49 $\pm$ 0.02                          | 0.91 $\pm$ 0.13                         | -0.68                               | 0.1095  |
| 8                   | 3728    | JUP         | 0.50 $\pm$ 0.02                          | 0.82 $\pm$ 0.10                         | ND                                  | ND      |
| 9                   | 1950    | EGF         | 0.51 $\pm$ 0.01                          | 0.91 $\pm$ 0.03                         | 0.04                                | 0.9635  |
| 10                  | 5159    | PDGFRB      | 0.53 $\pm$ 0.03                          | 0.96 $\pm$ 0.04                         | -0.29                               | 0.556   |
| 11                  | 4739    | NEDD9       | 0.53 $\pm$ 0.06                          | 1.07 $\pm$ 0.13                         | 0.68                                | 0.1095  |
| 12                  | 6714    | SRC         | 0.54 $\pm$ 0.03                          | 0.98 $\pm$ 0.16                         | -0.14                               | 0.7825  |
| 13                  | 25      | ABL1        | 0.54 $\pm$ 0.04                          | 0.97 $\pm$ 0.13                         | -0.46                               | 0.3024  |
| 14                  | 602     | BCL3        | 0.56 $\pm$ 0.04                          | 1.00 $\pm$ 0.01                         | 0.43                                | 0.3536  |
| 15                  | 1398    | CRK         | 0.57 $\pm$ 0.06                          | 1.08 $\pm$ 0.10                         | 0.46                                | 0.3024  |
| 16                  | 5359    | PLSCR1      | 0.59 $\pm$ 0.03                          | 0.87 $\pm$ 0.08                         | -0.04                               | 0.9635  |
| 17                  | 7409    | VAV1        | 0.59 $\pm$ 0.04                          | 0.99 $\pm$ 0.01                         | 0.64                                | 0.1389  |
| 18                  | 5063    | PAK3        | 0.61 $\pm$ 0.04                          | 0.96 $\pm$ 0.06                         | 0.43                                | 0.4194  |
| 19                  | 3717    | JAK2        | 0.63 $\pm$ 0.01                          | 0.92 $\pm$ 0.08                         | -0.54                               | 0.2357  |
| 20                  | 5336    | PLCG2       | 0.63 $\pm$ 0.03                          | 1.01 $\pm$ 0.10                         | 0.18                                | 0.7131  |
| 21                  | 8655    | DYNLL1      | 0.64 $\pm$ 0.03                          | 0.92 $\pm$ 0.03                         | -0.09                               | 0.8397  |
| 22                  | 2037    | EPB41L2     | 0.64 $\pm$ 0.04                          | 0.94 $\pm$ 0.14                         | -0.07                               | 0.9063  |
| 23                  | 54822   | TRPM7       | 0.66 $\pm$ 0.03                          | 0.97 $\pm$ 0.06                         | -0.04                               | 0.9635  |
| 24                  | 7071    | KLF10       | 0.68 $\pm$ 0.02                          | 1.01 $\pm$ 0.06                         | -0.54                               | 0.2357  |
| 25                  | 50855   | PARD6A      | 0.68 $\pm$ 0.02                          | 0.98 $\pm$ 0.01                         | -0.39                               | 0.3956  |
| 26                  | 309     | ANXA6       | 0.68 $\pm$ 0.06                          | 0.99 $\pm$ 0.14                         | -0.39                               | 0.3956  |
| 27                  | 5581    | PRKCE       | 0.69 $\pm$ 0.03                          | 0.97 $\pm$ 0.09                         | -0.96                               | 0.0028  |
| 28                  | 2885    | GRB2        | 0.69 $\pm$ 0.05                          | 0.97 $\pm$ 0.15                         | -0.71                               | 0.0881  |
| 29                  | 7525    | YES1        | 0.70 $\pm$ 0.01                          | 0.91 $\pm$ 0.01                         | -0.54                               | 0.2357  |
| 30                  | 5578    | PRKCA       | 0.76 $\pm$ 0.04                          | 1.00 $\pm$ 0.08                         | 0.93                                | 0.0067  |
| 31                  | 7520    | XRCC5       | 0.77 $\pm$ 0.01                          | 0.90 $\pm$ 0.03                         | -0.14                               | 0.7825  |
