# Supplementary material for: A Synthetic Lethality Screen Using a Focused siRNA Library to Identify Sensitizers to Dasatinib Therapy for the Treatment of Epithelial Ovarian Cancer
Source: PubMed Central journal article supplement (PMC4670180; doi:10.1371/journal.pone.0144126), 2015-12-04
Supplement: pone.0144126.s007.pdf [file pone.0144126.s007.pdf]

S4 Table

| Gene ID | Gene Symbol | Agilent Probe ID | Probe   | Average Expression in Tumor Tissue from Patients with Serous Ovarian Carcinoma | SEM  | Average Expression in Organ Specific Healthy Control Tissue | SEM  | Fold Change (Tumor: Healthy) | T-test, p value |
|---------|-------------|------------------|---------|--------------------------------------------------------------------------------|------|-------------------------------------------------------------|------|------------------------------|-----------------|
| 1605    | DAG1        | A_24_P225961     | Probe 1 | 0.821                                                                          | 0.02 | 0.374                                                       | 0.04 | 2.20                         | 1.9E-06         |
| 7409    | VAV1        | A_23_P38959      |         | 0.658                                                                          | 0.02 | 0.359                                                       | 0.04 | 1.83                         | 6.6E-05         |
| 1457    | CSNK2A1     | A_24_P76666      | Probe 1 | 0.554                                                                          | 0.01 | 0.310                                                       | 0.04 | 1.78                         | 2.1E-04         |
| 1457    | CSNK2A1     | A_23_P502575     | Probe 2 | 1.457                                                                          | 0.03 | 0.824                                                       | 0.05 | 1.77                         | 1.2E-07         |
| 7525    | YES1        | A_23_P164507     | Probe 2 | 0.688                                                                          | 0.02 | 0.428                                                       | 0.05 | 1.61                         | 5.2E-04         |
| 2885    | GRB2        | A_24_P39654      | Probe 2 | 0.665                                                                          | 0.01 | 0.417                                                       | 0.04 | 1.59                         | 1.8E-04         |
| 54822   | TRPM7       | A_23_P88470      | Probe 1 | 0.708                                                                          | 0.02 | 0.482                                                       | 0.05 | 1.47                         | 3.8E-03         |
| 54822   | TRPM7       | A_24_P50829      | Probe 2 | 1.291                                                                          | 0.04 | 0.969                                                       | 0.11 | 1.33                         | 2.2E-02         |
| 1605    | DAG1        | A_23_P212579     | Probe 2 | 1.512                                                                          | 0.02 | 1.177                                                       | 0.09 | 1.28                         | 5.6E-03         |
| 2036    | EPB41L1     | A_24_P185709     | Probe 1 | 2.321                                                                          | 0.06 | 1.843                                                       | 0.29 | 1.26                         | 1.4E-01         |
| 7520    | XRCC5       | A_24_P345498     |         | 0.800                                                                          | 0.01 | 0.646                                                       | 0.03 | 1.24                         | 5.7E-04         |
| 5578    | PRKCA       | A_23_P55099      | Probe 1 | 0.580                                                                          | 0.02 | 0.475                                                       | 0.05 | 1.22                         | 1.0E-01         |
| 5581    | PRKCE       | A_23_P250564     | Probe 2 | 2.065                                                                          | 0.04 | 1.751                                                       | 0.05 | 1.18                         | 2.7E-04         |
| 25      | ABL1        | A_24_P282416     | Probe 5 | 0.425                                                                          | 0.01 | 0.364                                                       | 0.03 | 1.17                         | 1.1E-01         |
| 602     | BCL3        | A_23_P4662       |         | 2.767                                                                          | 0.08 | 2.376                                                       | 0.54 | 1.16                         | 5.0E-01         |
| 5581    | PRKCE       | A_23_P348194     | Probe 1 | 1.319                                                                          | 0.02 | 1.143                                                       | 0.09 | 1.15                         | 1.0E-01         |
| 7525    | YES1        | A_24_P48403      | Probe 1 | 0.981                                                                          | 0.05 | 0.853                                                       | 0.06 | 1.15                         | 1.0E-01         |
| 2885    | GRB2        | A_23_P77847      | Probe 1 | 0.799                                                                          | 0.01 | 0.707                                                       | 0.02 | 1.13                         | 2.9E-03         |
| 1398    | CRK         | A_23_P83556      | Probe 2 | 0.838                                                                          | 0.02 | 0.745                                                       | 0.08 | 1.13                         | 3.0E-01         |
| 2885    | GRB2        | A_24_P407717     | Probe 3 | 0.556                                                                          | 0.01 | 0.510                                                       | 0.05 | 1.09                         | 3.9E-01         |
| 6714    | SRC         | A_23_P308603     |         | 1.678                                                                          | 0.03 | 1.613                                                       | 0.08 | 1.04                         | 4.7E-01         |
| 3717    | JAK2        | A_23_P123608     |         | 0.726                                                                          | 0.02 | 0.704                                                       | 0.06 | 1.03                         | 7.4E-01         |
| 1398    | CRK         | A_24_P270814     | Probe 1 | 0.843                                                                          | 0.02 | 0.822                                                       | 0.08 | 1.03                         | 7.9E-01         |
| 896     | CCND3       | A_23_P361773     |         | 0.736                                                                          | 0.02 | 0.719                                                       | 0.11 | 1.02                         | 8.8E-01         |
| 5336    | PLCG2       | A_23_P106675     |         | 2.198                                                                          | 0.06 | 2.188                                                       | 0.34 | 1.00                         | 9.8E-01         |
| 8412    | BCAR3       | A_23_P97394      |         | 0.984                                                                          | 0.02 | 0.997                                                       | 0.09 | 0.99                         | 8.9E-01         |
| 50855   | PARD6A      | A_23_P140821     |         | 0.768                                                                          | 0.03 | 0.785                                                       | 0.15 | 0.98                         | 9.2E-01         |
| 2889    | RAPGEF1     | A_23_P391764     | Probe 1 | 1.281                                                                          | 0.02 | 1.313                                                       | 0.05 | 0.98                         | 5.5E-01         |
| 25      | ABL1        | A_24_P291016     | Probe 4 | 0.986                                                                          | 0.01 | 1.020                                                       | 0.04 | 0.97                         | 4.3E-01         |
| 5359    | PLSCR1      | A_23_P69109      |         | 3.743                                                                          | 0.12 | 3.892                                                       | 0.57 | 0.96                         | 8.1E-01         |
| 7071    | KLF10       | A_23_P168828     |         | 1.025                                                                          | 0.03 | 1.125                                                       | 0.21 | 0.91                         | 6.5E-01         |
| 4739    | NEDD9       | A_23_P344555     |         | 1.035                                                                          | 0.05 | 1.194                                                       | 0.20 | 0.87                         | 4.7E-01         |
| 1950    | EGF         | A_23_P155979     |         | 0.531                                                                          | 0.03 | 0.619                                                       | 0.05 | 0.86                         | 1.4E-01         |
| 25      | ABL1        | A_24_P393711     | Probe 3 | 0.734                                                                          | 0.01 | 0.867                                                       | 0.04 | 0.85                         | 1.9E-02         |
| 309     | ANXA6       | A_23_P357104     |         | 0.368                                                                          | 0.01 | 0.460                                                       | 0.04 | 0.80                         | 6.4E-02         |
| 8655    | DYNLL1      | A_24_P124672     | Probe 2 | 1.502                                                                          | 0.02 | 1.979                                                       | 0.22 | 0.76                         | 7.2E-02         |
| 5578    | PRKCA       | A_24_P916496     | Probe 2 | 0.447                                                                          | 0.02 | 0.606                                                       | 0.07 | 0.74                         | 4.7E-02         |
| 25      | ABL1        | A_23_P60180      | Probe 2 | 0.720                                                                          | 0.01 | 0.979                                                       | 0.04 | 0.74                         | 9.4E-05         |
| 25      | ABL1        | A_24_P281101     | Probe 1 | 0.666                                                                          | 0.01 | 0.909                                                       | 0.04 | 0.73                         | 2.3E-04         |
| 2036    | EPB41L1     | A_23_P154806     | Probe 2 | 1.606                                                                          | 0.04 | 2.193                                                       | 0.20 | 0.73                         | 2.1E-02         |
| 2889    | RAPGEF1     | A_23_P304237     | Probe 2 | 0.453                                                                          | 0.01 | 0.699                                                       | 0.05 | 0.65                         | 1.1E-03         |
| 8655    | DYNLL1      | A_23_P65031      | Probe 1 | 1.440                                                                          | 0.02 | 2.266                                                       | 0.23 | 0.64                         | 7.9E-03         |
| 5159    | PDGFRB      | A_23_P421401     |         | 3.072                                                                          | 0.12 | 5.205                                                       | 1.10 | 0.59                         | 9.5E-02         |
| 2037    | EPB41L2     | A_23_P134109     |         | 1.207                                                                          | 0.05 | 2.200                                                       | 0.38 | 0.55                         | 3.4E-02         |
| 5063    | PAK3        | A_23_P346813     |         | 1.433                                                                          | 0.09 | 3.623                                                       | 0.71 | 0.40                         | 1.7E-02         |
